# Supplementary material
Source: Springer Nature journal article supplement (https://www.springermedizin.de/resource/supplementary/13613_2012_84_MOESM6_ESM.pdf/12196116)

# Nature

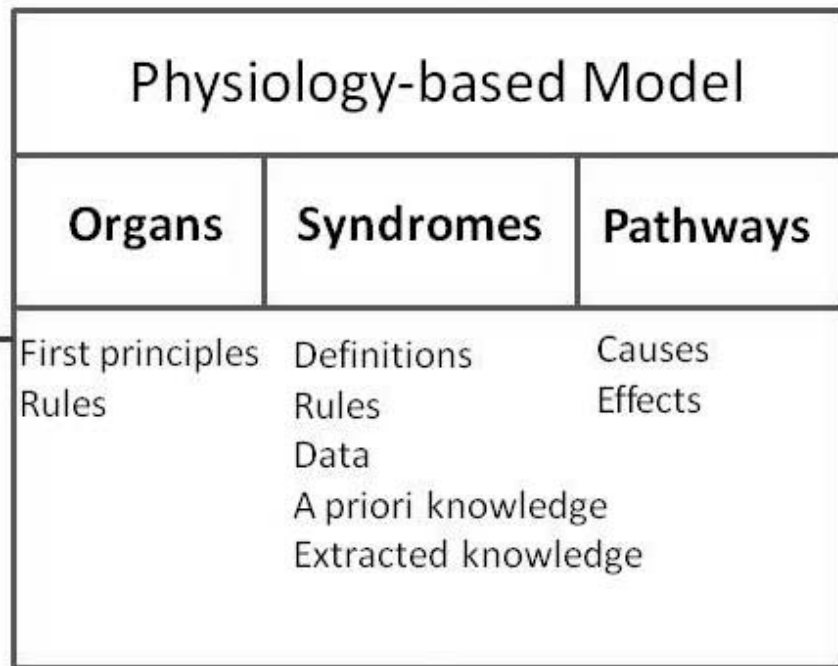

# Nurture

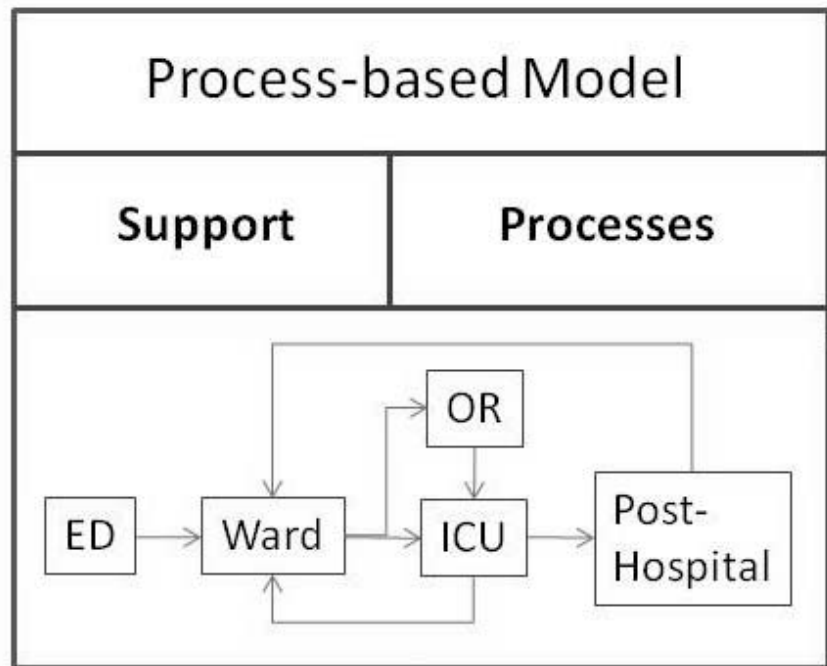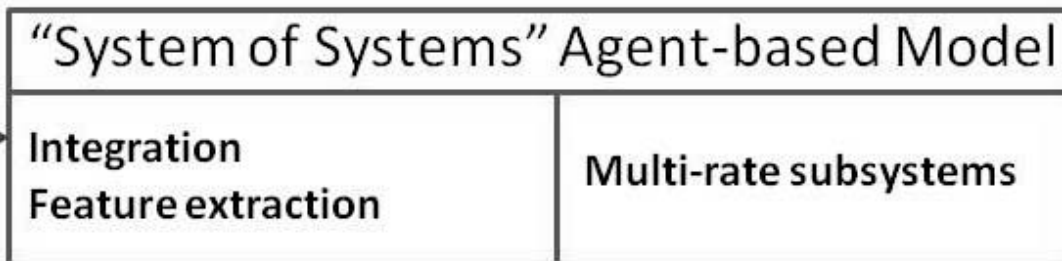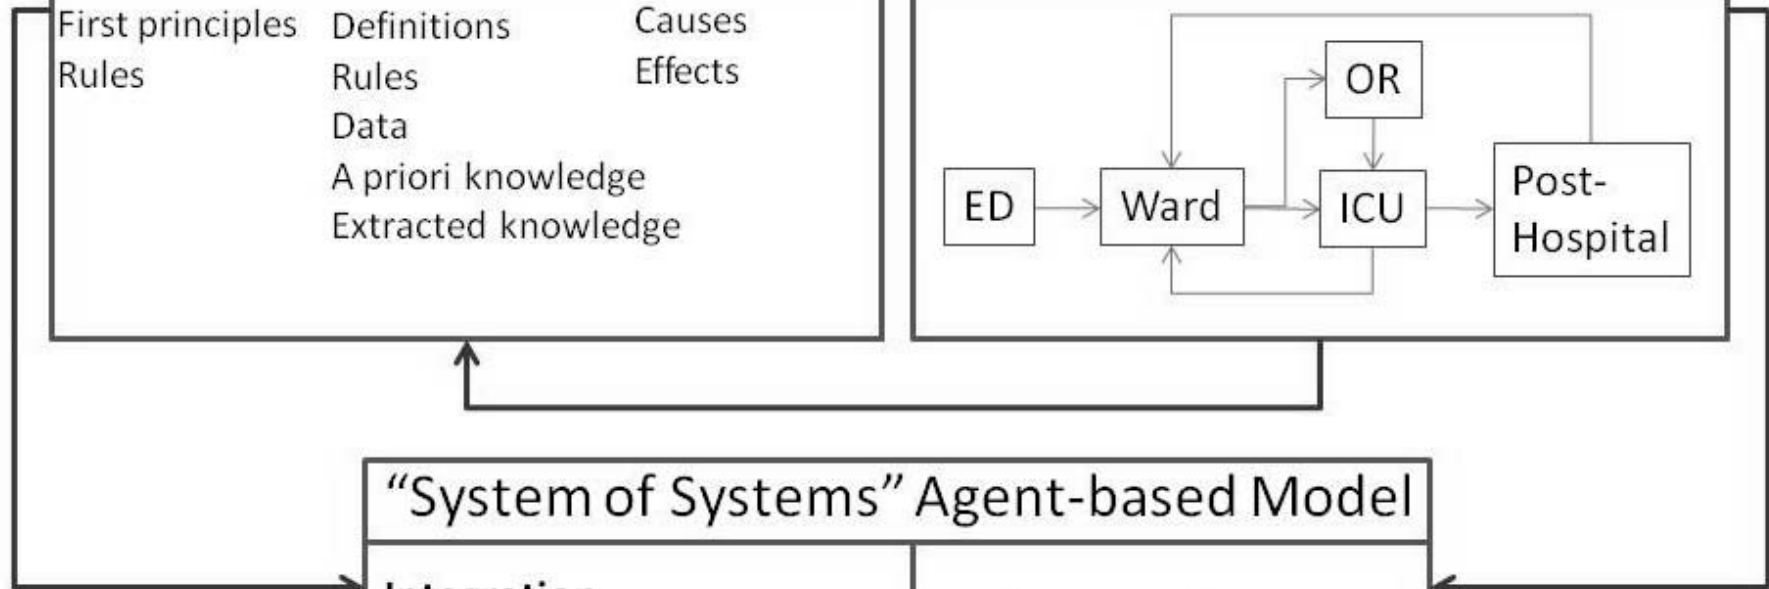

Supplement: MOESM6 [file 12196116]
